# Supplementary material for: Utilizing Gold Nanoparticle Decoration for Enhanced UV Photodetection in CdS Thin Films Fabricated by Pulsed Laser Deposition: Exploiting Plasmon-Induced Effects
Source: MDPI journal article supplement (doi:10.3390/nano14050416), 2024-02-24
Supplement: s1 [file s1]

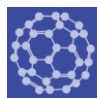

Supplementary Information

# Utilizing Gold Nanoparticle Decoration for Enhanced UV Photodetection in CdS Thin Films Fabricated by Pulsed Laser Deposition: Exploiting Plasmon-Induced Effects

Walid Belaid <sup>1</sup>, Serap Yiğit Gezgin <sup>1</sup>, Mohamed A. Basyooni-M. Kabatas <sup>2,3,4,\*</sup>, Yasin Ramazan Eker <sup>4,5</sup>  
and Hamdi Şükür Kiliç <sup>1,6,7</sup>

<sup>1</sup> Department of Physics, Faculty of Science, Selçuk University, Konya 42075, Turkey; walid.belaid@usmba.ac.ma (W.B.); serap.gezgin@selcuk.edu.tr (S.Y.G.); hamdisukurkili@selcuk.edu.tr (H.Ş.K.)

<sup>2</sup> Dynamics of Micro and Nano Systems Group, Department of Precision and Microsystems Engineering, Delft University of Technology, Mekelweg 2, 2628 CD Delft, The Netherlands

<sup>3</sup> Solar Research Laboratory, Solar and Space Research Department, National Research Institute of Astronomy and Geophysics, Cairo 11421, Egypt

<sup>4</sup> Science and Technology Research and Application Center (BITAM), Necmettin Erbakan University, Konya 42090, Turkey; yeker@erbakan.edu.tr

<sup>5</sup> Department of Basic Sciences, Faculty of Engineering, Necmettin Erbakan University, Konya 42090, Turkey

<sup>6</sup> Directorate of High Technology Research and Application Center, University of Selçuk, Konya 42031, Turkey

<sup>7</sup> Directorate of Laser-Induced Proton Therapy Application and Research Center, University of Selçuk, Konya 42031, Turkey

\* Correspondence: m.kabatas@tudelft.nl or m.a.basyooni@gmail.com

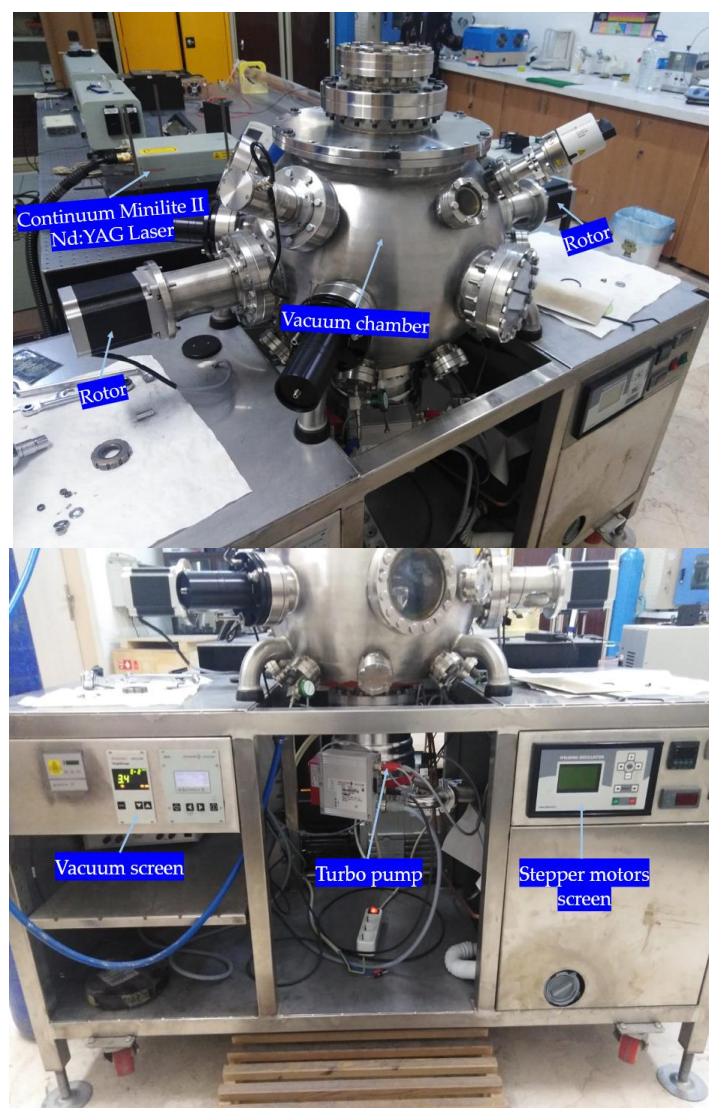

**Figure S1.** The used PLD system.

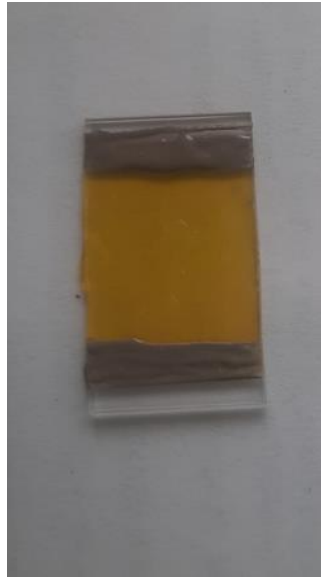

**Figure S2.** Photographic image of CdS thin film sample with Silver (Ag) Electrodes.

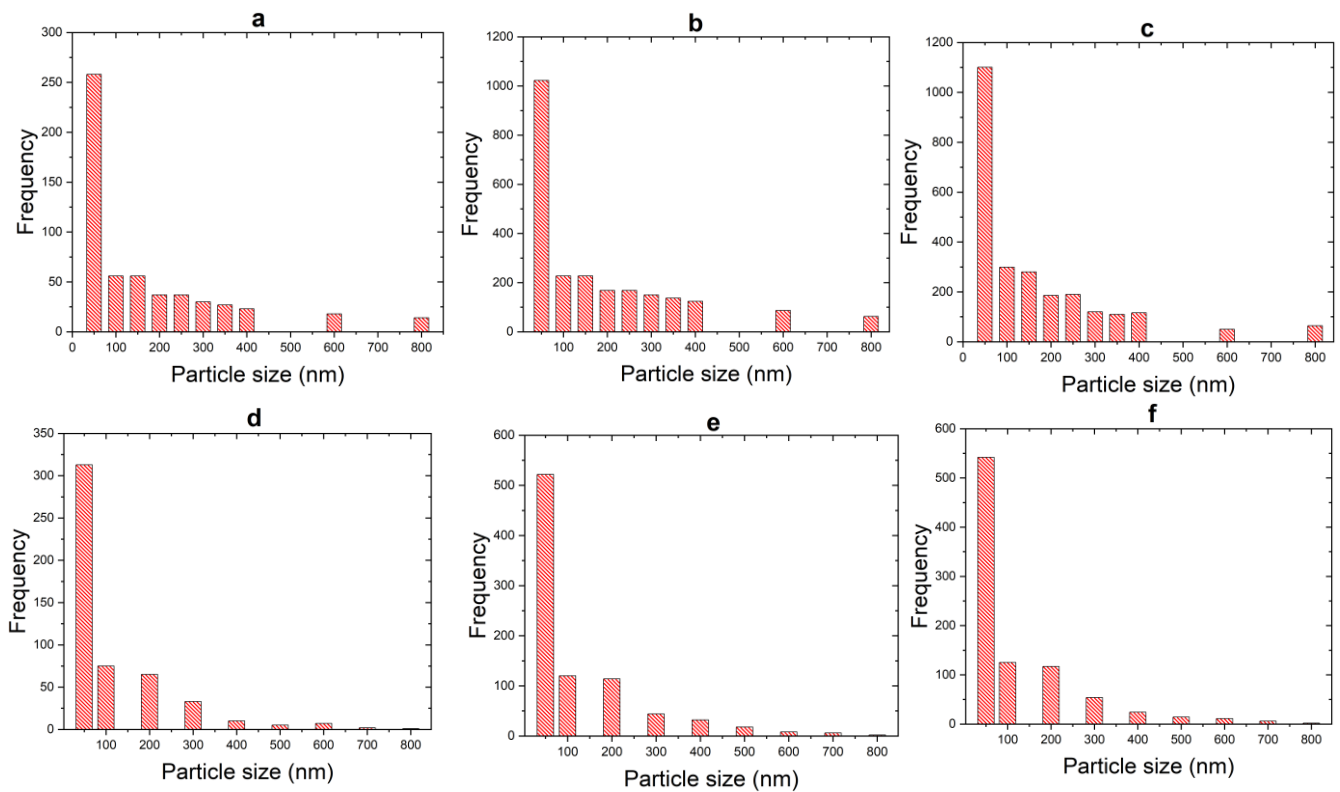

**Figure S3.** Frequency distribution of nanoparticle sizes for samples S1-S6, labeled (a-f) respectively. This histogram represents the uniformity in particle sizes as determined by ImageJ analysis providing information on the surface distribution of nanoparticles.

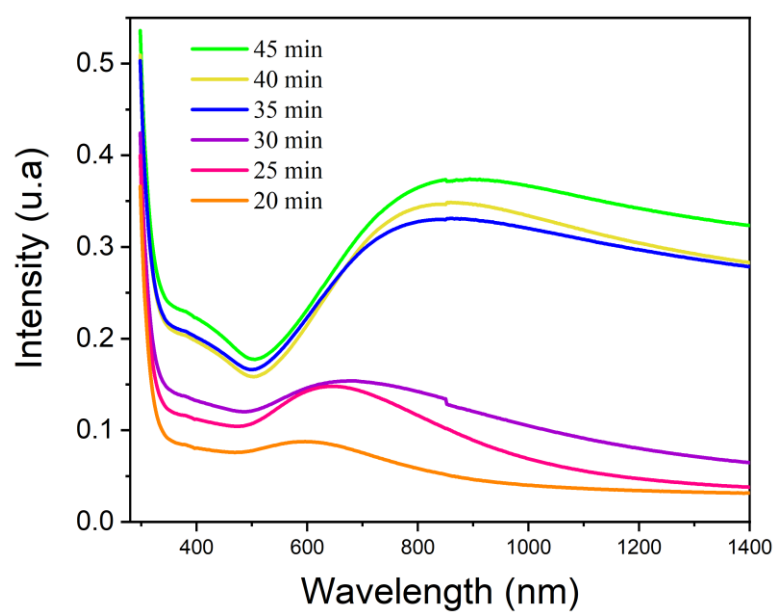

**Figure S4.** UV-Visible Absorption Spectra for Gold Nanoparticles deposited with an energy of 20 mJ at Room Temperature for different deposition time.
